# Supplementary material for: High-strength cellulose nanofibers producedviaswelling pretreatment based on a choline chloride–imidazole deep eutectic solvent
Source: Royal Society of Chemistry journal article supplement (doi:10.1039/c9gc04119b), 2020-01-01
Supplement: c9gc04119b1.pdf [file c9gc04119b1.pdf]

High-strength cellulose nanofibers produced via swelling pretreatment based on a choline chloride–imidazole deep eutectic solvent

Juho Antti Sirviö,<sup>a\*</sup> Kalle Hyypiö<sup>a</sup>, Shirin Asaadi<sup>b</sup>, Karoliina Junka<sup>b</sup>, Henriikki Liimatainen<sup>a</sup>

<sup>a</sup>Fibre and Particle Engineering Research Unit, University of Oulu, P.O. Box 4300, 90014 Oulu, Finland E-mail: [juho.sirvio@oulu.fi](mailto:juho.sirvio@oulu.fi)

<sup>b</sup>BillerudKorsnäs AB, Box 703, 169 27 Solna, Stockholm, Sweden

Table S1. Fiber width and CWT of cellulose fibers after treatment with CCIMI DESs at various cellulose/solvent mass ratios for 1 h.

| Entry | Cellulose/DES mass ratio | Temperature (°C) | Fiber properties |          |
|-------|--------------------------|------------------|------------------|----------|
|       |                          |                  | Width (μm)       | CWT (μm) |
| 1     | 1:50                     | 60               | 19.3             | 6.4      |
| 2     | 1:50                     | 80               | 19.5             | 6.3      |
| 3     | 1:50                     | 100              | 19.5             | 6.2      |
| 4     | 1:33                     | 60               | 19.3             | 6.3      |
| 5     | 1:33                     | 80               | 19.6             | 6.5      |
| 6     | 1:33                     | 100              | 19.7             | 6.3      |
| 7     | 1:25                     | 60               | 19.2             | 6.2      |
| 8     | 1:25                     | 80               | 19.2             | 6.3      |
| 9     | 1:25                     | 100              | 19.6             | 6.5      |

10

Table S2. The number average molar mass ( $M_n$ ), weight average molar mass ( $M_w$ ), and polydispersity (PD) of cellulose before and after treatment with CCIMI at 100°C for 180 min and CCUrea 100°C for 120 min

| Sample              | $M_n$ (g/mol)   | $M_w$ (g/mol)    | PD         |
|---------------------|-----------------|------------------|------------|
| Original pulp       | 47 000 ± 3000   | 476 000 ± 29 000 | 10.2 ± 0.3 |
| CCIMI 100C 180 min  | 51 000 ± 2000   | 543 000 ± 85 000 | 10.6 ± 1.7 |
| CCUrea 100C 120 min | 52 000 ± 13 000 | 728 000 ± 79 000 | 14.4 ± 2.2 |

15

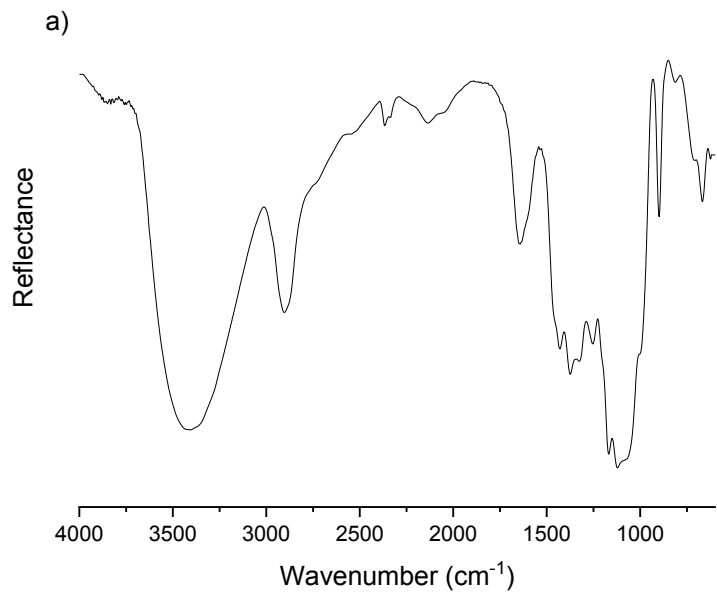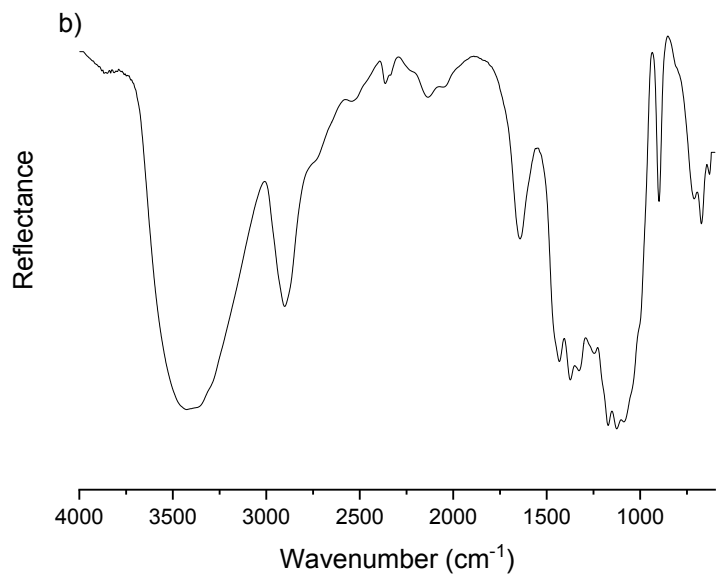

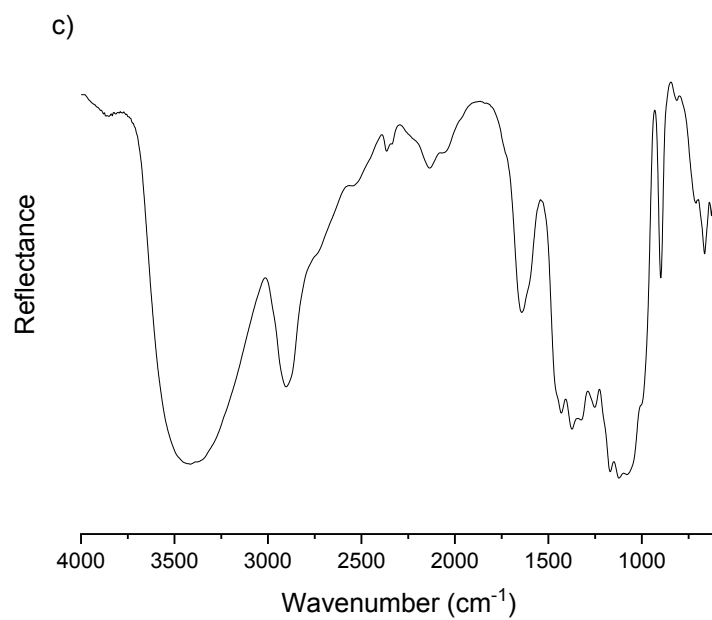

Figure S1. DRIFT spectra of DES treated fibers: a) CCIMI 15 min 60 °C, b) CCIMI 180 min 60 °C,

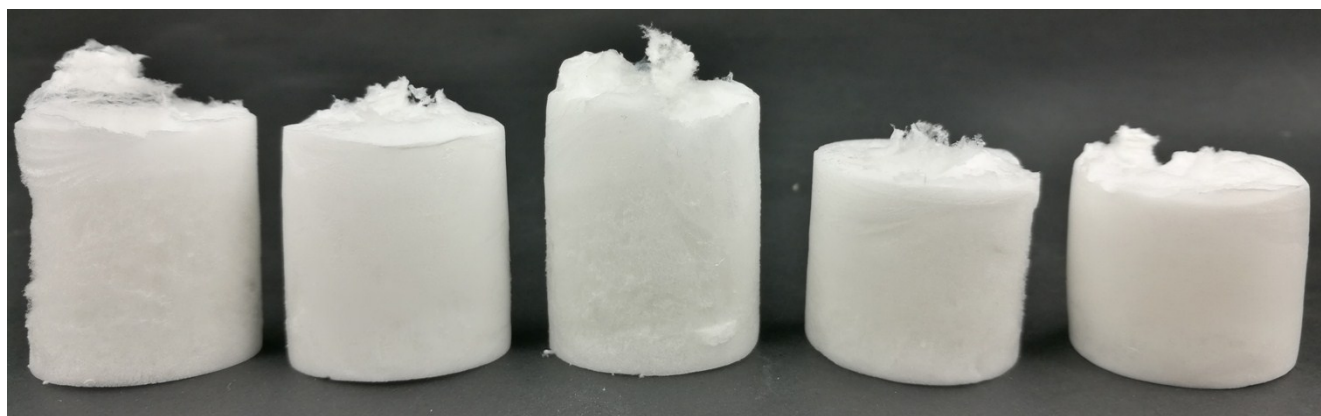

5 Figure S2. Aerogels produced by freeze-drying from CNFs obtained from DES treated cellulose fibers, from left to right: CCIMI 15 min 60 °C; CCIMI 180 min 60 °C; CCIMI 15 min 100 °C; CCIMI 180 min 100 °C; CCUrea 120 min 100 °C

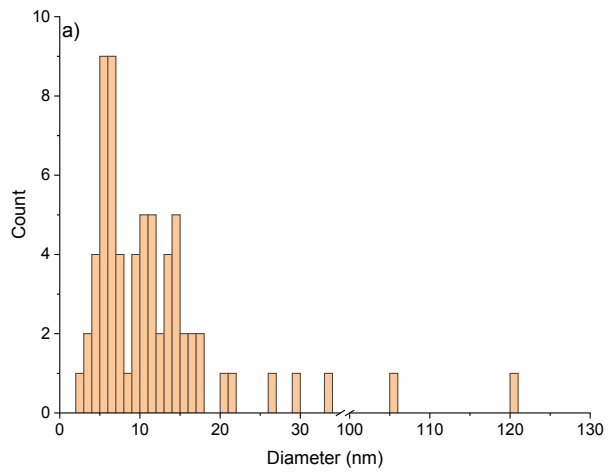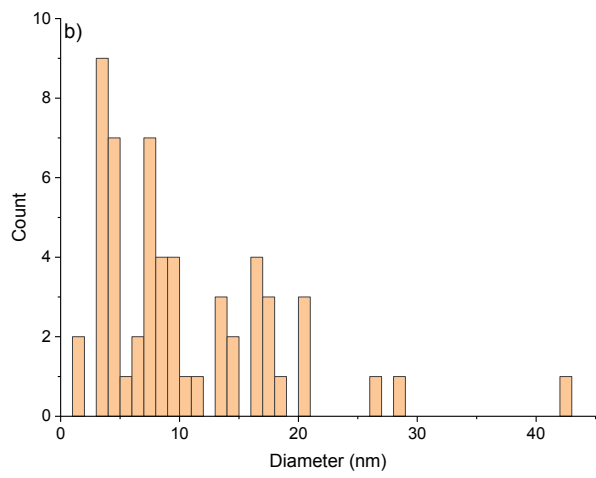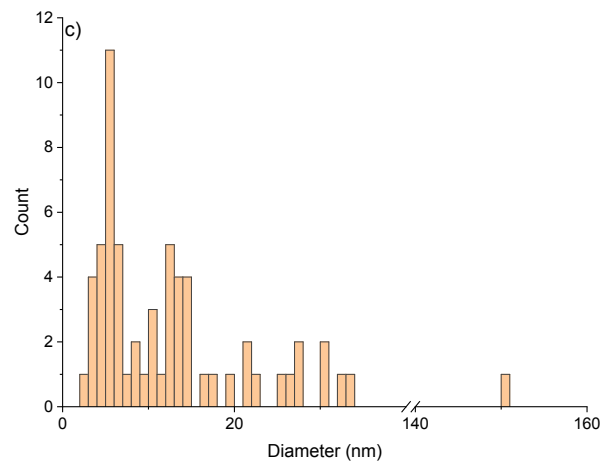

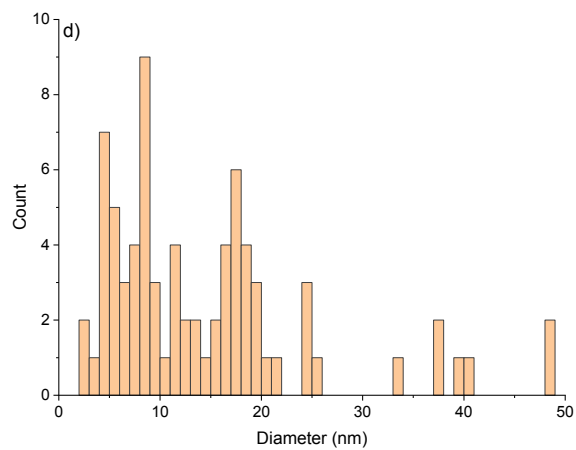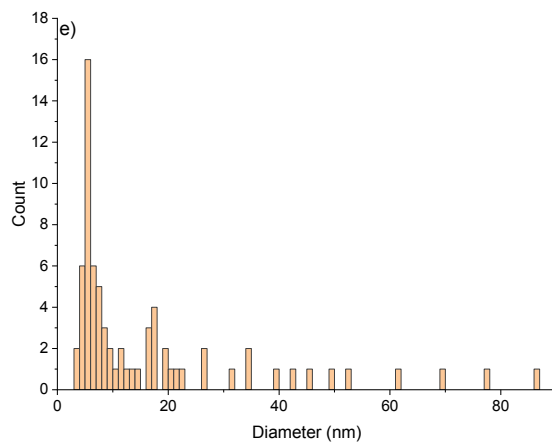

Figure S3. The histograms of the diameters of cellulose nanofibers produced from DES pre-treated fibers. a) CCUrea 60 °C 15 min b) CCUrea 60 °C 180 min c) CCUrea 100 °C 15 min d) CCUrea 100 °C 180 min e) CCUrea 100 °C 120 min

5

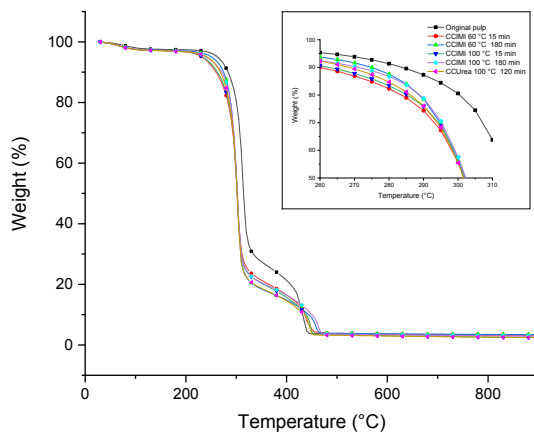

Figure S4. TGA curves of original pulp and CNFs produced from CCIMI and CCUrea treated fiber measured in air.

Table S3. Yield and the water content of the CCIMI after recycling

| Recycling times | Mass after evaporation (g) | Water content (%) <sup>a</sup> |
|-----------------|----------------------------|--------------------------------|
| 1               | 263                        | 4.9                            |
| 2               | 264                        | 5.3                            |
| 3               | 260                        | 3.8                            |
| 4               | 260                        | 3.8                            |

<sup>a</sup> Calculated from the original mass of the DES

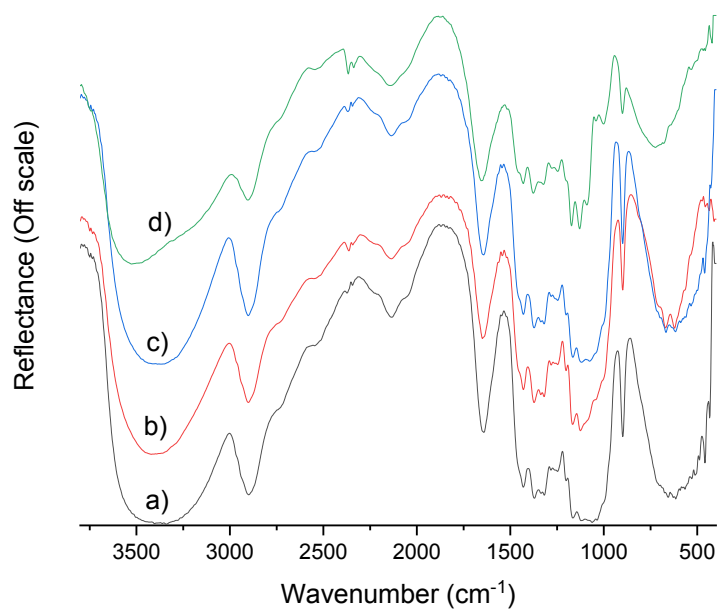

5

Figure S5. DRIFT spectra of CNFs produced using pristine CCIMI (a) and after 1 (b), 2 (c), and 3 (d) recycling.
